# Supplementary material
Source: Springer Nature journal article supplement (https://www.springermedizin.de/resource/supplementary/13018_2010_252_MOESM8_ESM.pdf/9636630)

Review: Is Surgical Intervention More Effective Than Non-surgical Treatment for CTS

Comparison: 02 Surgery vs non-surgery at 6 months

Outcome: 01 Patient self-reported symptom score at 6 months

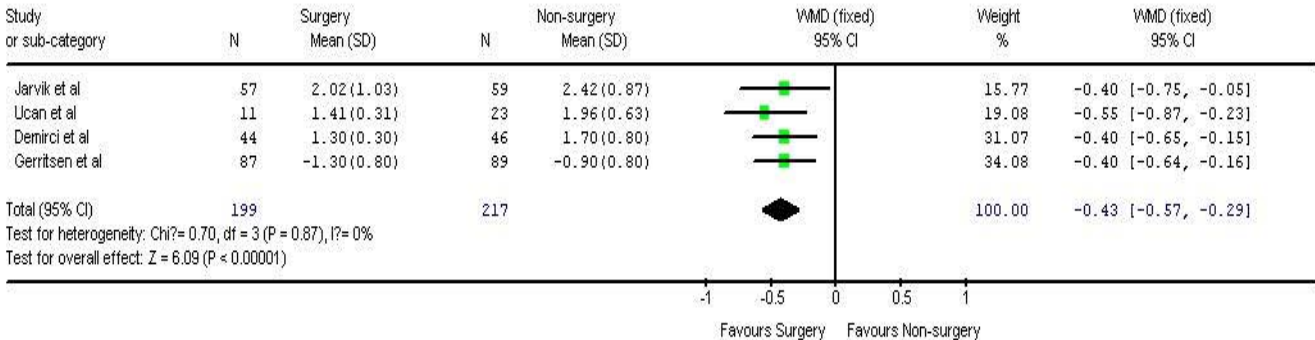

Supplement: MOESM8 [file 9636630]
